# Supplementary material for: The Recovery is Sustained: The Nebraska Business Forecast Council
Source: MDPI journal article supplement (doi:10.3390/ncrna7040080), 2005-01-01
Supplement: s1 [file s1]

**Supplementary information:** The supplementary data includes Figure S1 to Figure S3, Table S1 to Table S3.

Figure S1: Representative consecutive pictures on early-stage NSCLC of patients screened by CT (first line) and LDCT (second line).

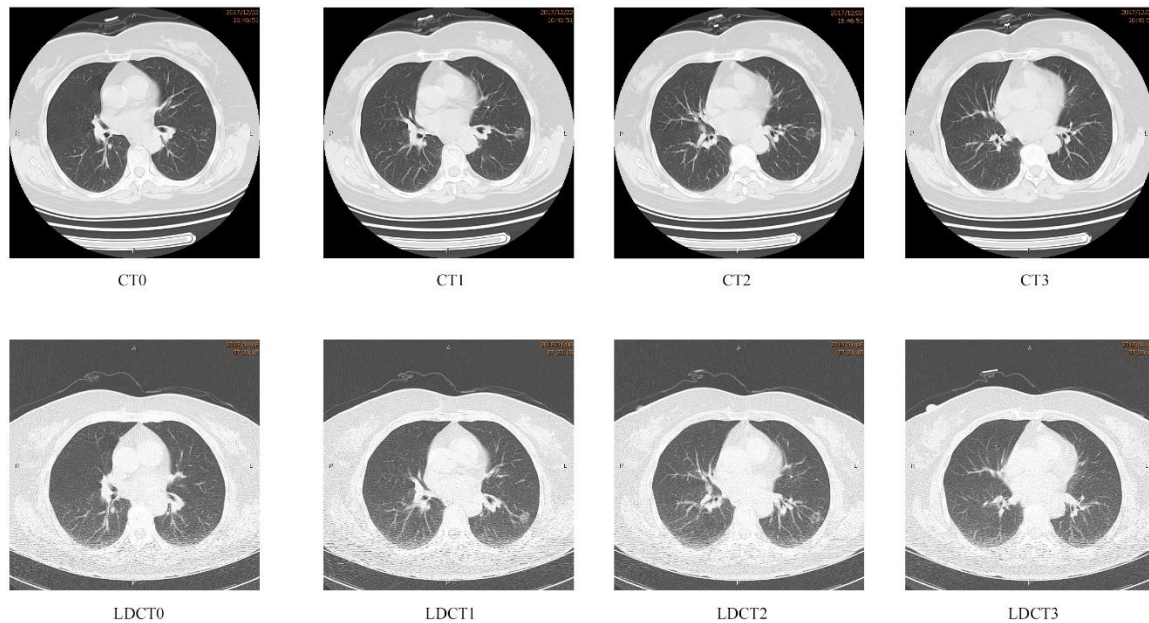

Figure S2: The representative Amplification Plot and Melt Curve Plot of pfeRNA a-d in different plasma.

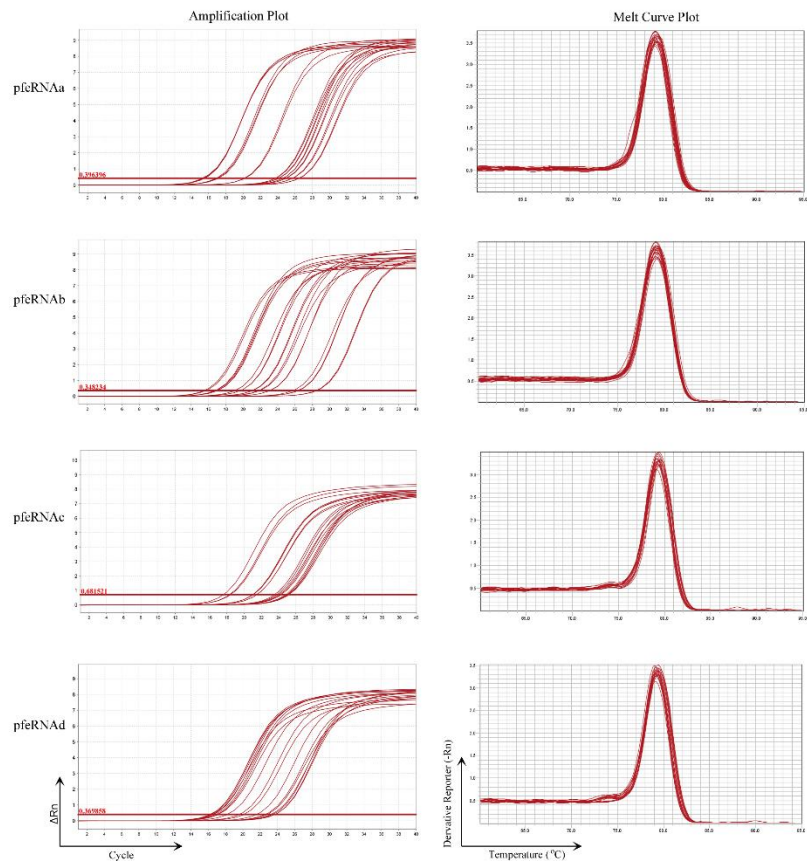

Figure S3: The representative Amplification Plot and Melt Curve Plot of pfeRNA e-h in different plasma.

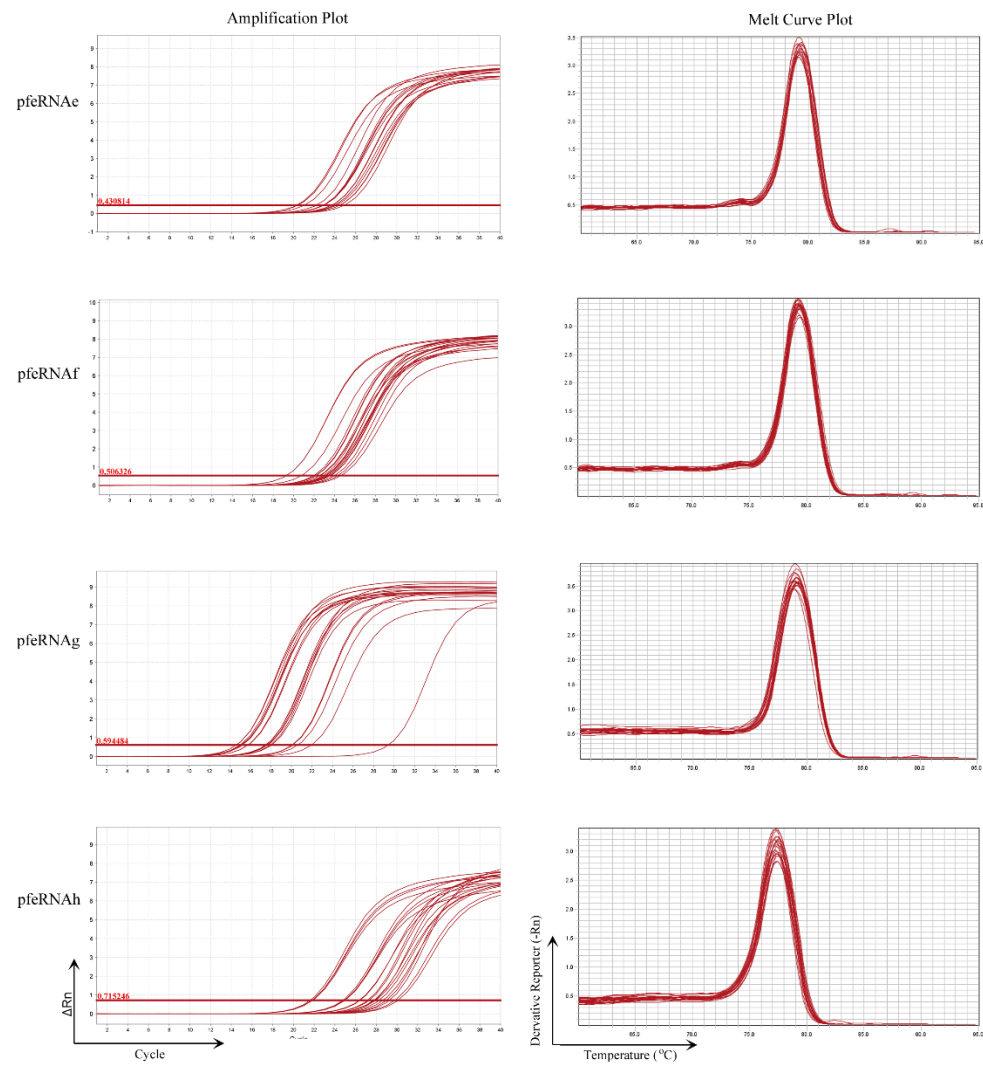

Table S1: Sequences of primers and adaptors

| Name                  | sequences (5' to 3')                  | application           |
|-----------------------|---------------------------------------|-----------------------|
| 3' adaptor            | rapp/5'-CTGTAGGCACCATCAAT-3'/3'ddc    | ligation              |
| gene-specific primer  | CAAGCAGAAGACGGCATACGATTGATGGTGCCTACAG | Reverse Transcription |
| common reverse primer | CAAGCAGAAGACGGCATACGA                 | RT-PCR                |
| pfeRNAaF              | CACTGCTAAATTTGACTGGCTT                | qPCR                  |
| pfeRNAbF              | CGTGGTTGTAGTCCGTGCGA                  | qPCR                  |
| pfeRNAcF              | TAGCTTATCAGACTGATGTTGA                | qPCR                  |
| pfeRNAcF              | ATGGAAGTGGGTTATCAGAAC                 | qPCR                  |
| pfeRNAeF              | CGGATCCGTCTGAGCTTGGC                  | qPCR                  |
| pfeRNAfF              | CAACTTAACCTTGACCGCTCTGACCA            | qPCR                  |
| pfeRNAgF              | GCTGGTCCGATGGTAGTGGG                  | qPCR                  |
| pfeRNAhF              | GGGTGTGATAGGTGGCACGG                  | qPCR                  |

Table S2: Smoking intensity in pack-year among different groups

| Pack years                      | 1~10  | 11~20 | 21~30 | 31~40  | 41~50 | 51~60 | >61   | percentage of smokers |
|---------------------------------|-------|-------|-------|--------|-------|-------|-------|-----------------------|
| Healthy controls                | 5.20% | 9.09% | 6.49% | 7.79%  | 6.49% | 5.19% | 1.30% | 41.55%                |
| Controls with benign nodules    | 5.56% | 7.40% | 9.26% | 11.11% | 5.56% | 3.70% | 1.85% | 44.44%                |
| Patients with malignant nodules | 6%    | 7.17% | 8.30% | 8.68%  | 5.28% | 3.40% | 7.55% | 46.41%                |

Table S3: Percentage of different subtypes of NSCLC

|                   | Adenocarcinoma | Squamous | Adenosquamous | Large Cell |
|-------------------|----------------|----------|---------------|------------|
| Discovery cohort  | 18             | 16       | 2             |            |
| Training cohort   | 94             | 30       | 2             |            |
| Validation cohort | 113            | 41       | 3             | 2          |
| Total             | 225            | 87       | 7             | 2          |
| Percentage        | 70.09%         | 27.10%   | 2.18%         | 0.62%      |
